# Supplementary figures and images for: Ultra-Processed Foods and Cardiometabolic Risk: From Evidence to Policy
Source: Research Square preprint supplement (doi:10.21203/rs.3.rs-8430013/v1), 2026-01-19

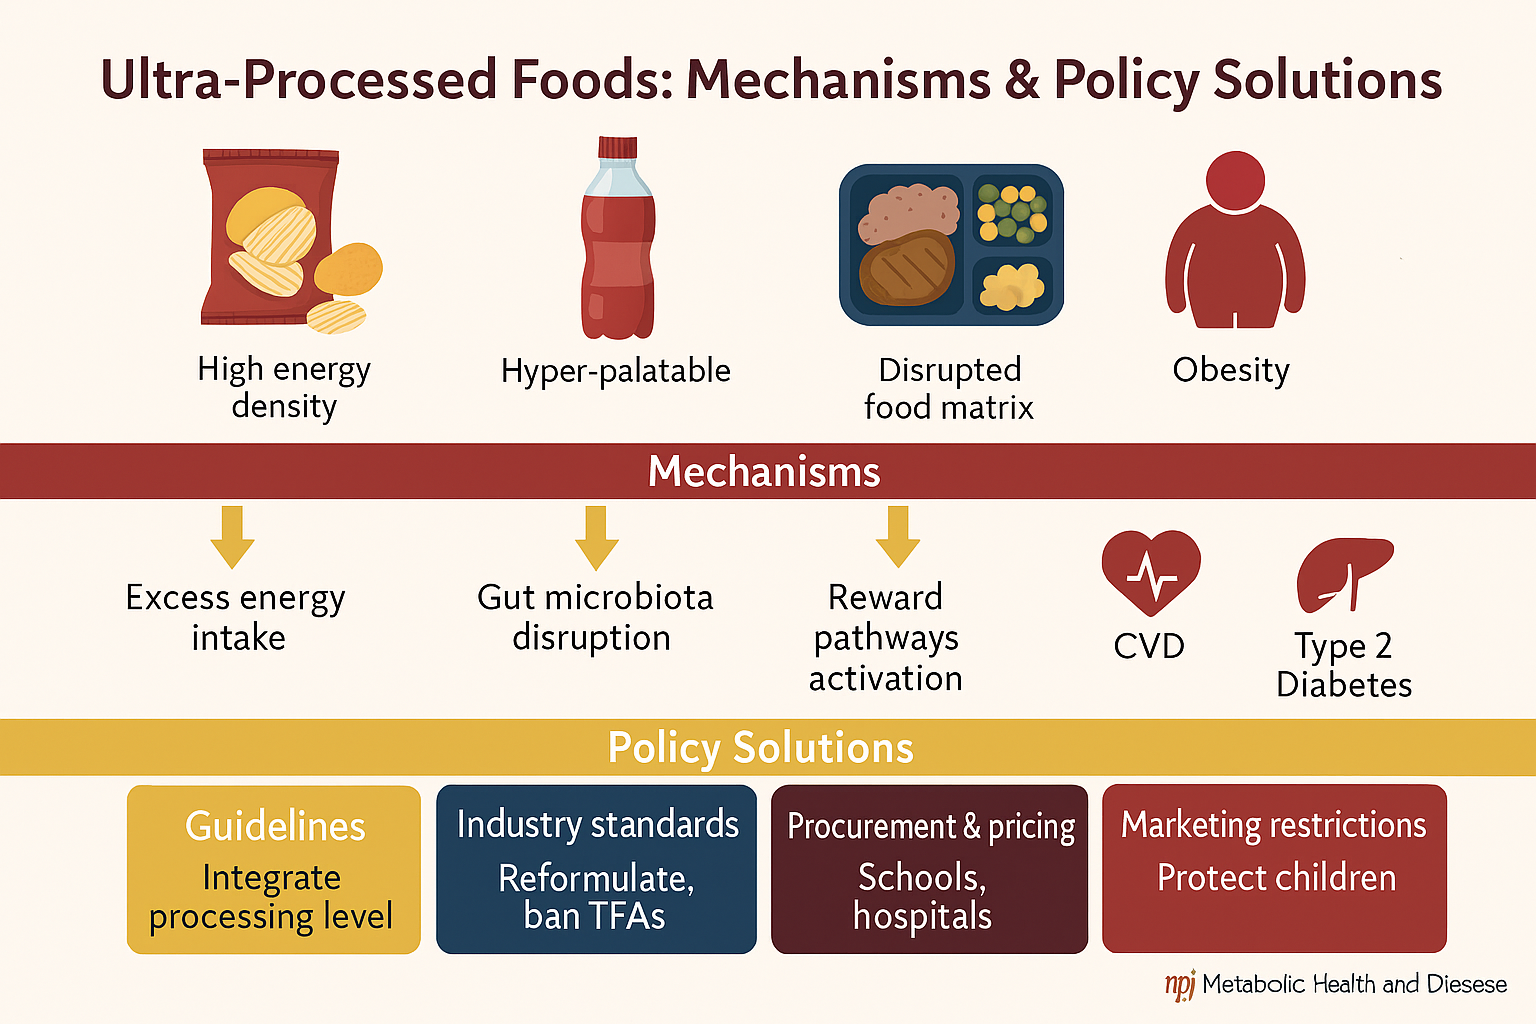


Image: CoPilot


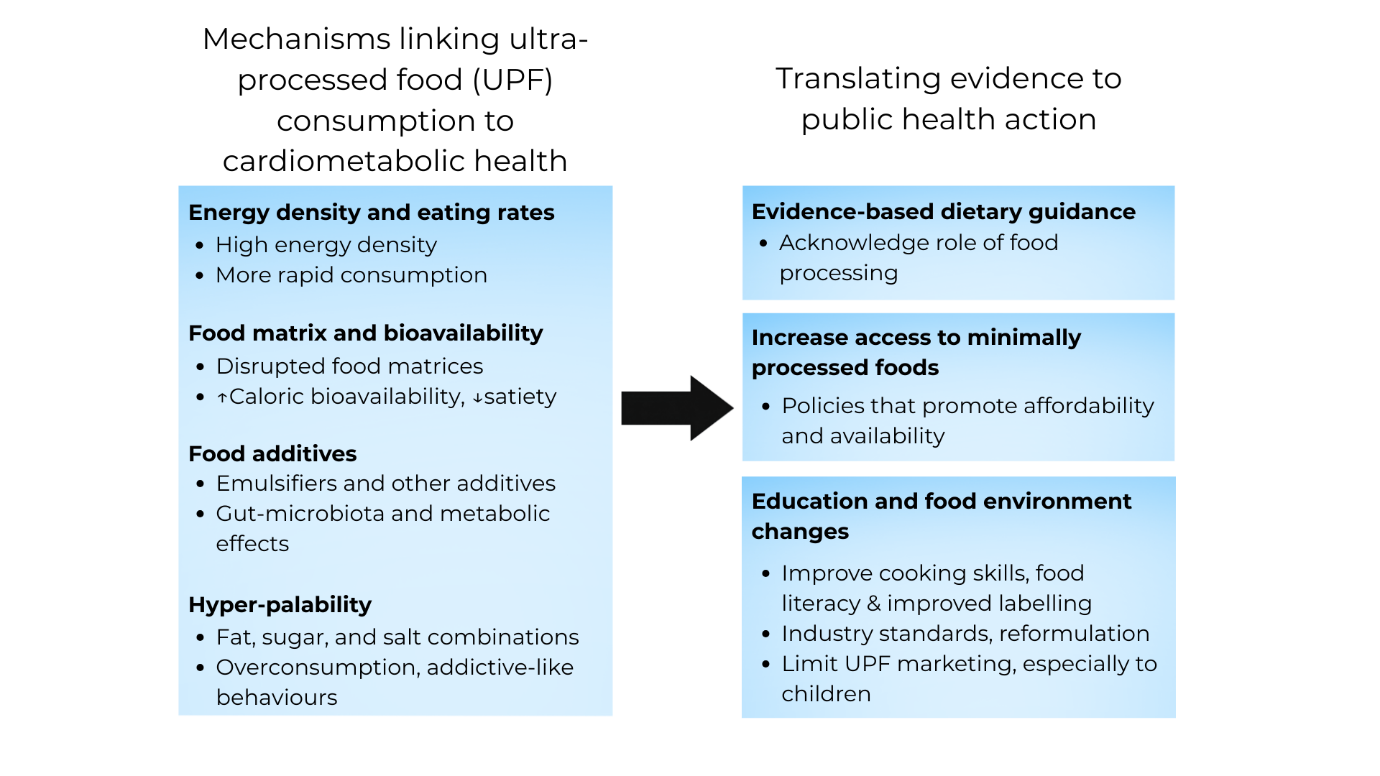

Supplement: Supplementary file 1 [file 095bc68a5814e9b4bbd71d60.docx]
